# Supplementary material for: A relationship between progesterone, maternal body weight, and offspring sex following the frozen/thawed single embryo transfer.
Source: Research Square preprint supplement (doi:10.21203/rs.3.rs-3837886/v1), 2024-01-17
Supplement: Supplementary file 1 [file e8df9f53d6e0fd1ee6b76ebf.pdf]

**Table 1. Characteristics of the studied sample with a distribution of female and male childbirth.**

| <i>Characteristic</i>                 | <i>Childbirth</i>                           |                                              | <i>p</i> <sup>3</sup> |
|---------------------------------------|---------------------------------------------|----------------------------------------------|-----------------------|
|                                       | <i>No, n<sub>1</sub> = 504</i> <sup>1</sup> | <i>Yes, n<sub>2</sub> = 424</i> <sup>1</sup> |                       |
| <b>Maternal age, yrs.</b>             | 32.00 (29.00, 36.00)                        | 32.00 (30.00, 35.00)                         | 0.118                 |
| <b>Maternal BMI, kg/m<sup>2</sup></b> | 22.05 (20.20, 24.90)                        | 22.20 (20.38, 24.80)                         | 0.536                 |
| <b>PRG:</b>                           |                                             |                                              |                       |
| up to 20 ng/ml                        | 262 (51.98%) <sup>2</sup>                   | 221 (52.12%) <sup>2</sup>                    | 0.966 <sup>3</sup>    |
| over 20 ng/ml                         | 242 (48.02%) <sup>2</sup>                   | 203 (47.88%) <sup>2</sup>                    |                       |
|                                       | <b><i>Female childbirth</i></b>             |                                              |                       |
|                                       | <i>no, n<sub>1</sub> = 717</i> <sup>1</sup> | <i>yes, n<sub>2</sub> = 211</i> <sup>1</sup> |                       |
| <b>Maternal age, yrs.</b>             | 32.00 (29.00, 35.00)                        | 32.00 (30.00, 35.00)                         | 0.948                 |
| <b>Maternal BMI, kg/m<sup>2</sup></b> | 22.00 (20.20, 24.74)                        | 22.30 (20.85, 25.36)                         | <b>0.031</b>          |
| <b>PRG:</b>                           |                                             |                                              |                       |
| up to 20 ng/ml                        | 384 (53.56%) <sup>2</sup>                   | 99 (46.92%) <sup>2</sup>                     | 0.090 <sup>3</sup>    |
| over 20 ng/ml                         | 333 (46.44%) <sup>2</sup>                   | 112 (53.08%) <sup>2</sup>                    |                       |
|                                       | <b><i>Male childbirth</i></b>               |                                              |                       |
|                                       | <i>no, n<sub>1</sub> = 715</i> <sup>1</sup> | <i>yes, n<sub>2</sub> = 213</i> <sup>1</sup> |                       |
| <b>Maternal age, yrs.</b>             | 32.00 (30.00, 36.00)                        | 31.00 (29.00, 35.00)                         | 0.055                 |
| <b>Maternal BMI, kg/m<sup>2</sup></b> | 22.10 (20.30, 25.10)                        | 21.80 (20.10, 24.60)                         | 0.155                 |
| <b>PRG:</b>                           |                                             |                                              |                       |
| up to 20 ng/ml                        | 361 (50.49%) <sup>2</sup>                   | 122 (57.28%) <sup>2</sup>                    | 0.082 <sup>3</sup>    |
| over 20 ng/ml                         | 354 (49.51%) <sup>2</sup>                   | 91 (42.72%) <sup>2</sup>                     |                       |

<sup>1</sup> *Mdn* (Q1, Q3); <sup>2</sup> *n* (%); <sup>3</sup> Wilcoxon rank sum test; <sup>4</sup> Pearson's Chi-squared test
